# Supplementary material
Source: PubMed Central journal article supplement (PMC4345617)
Supplement: pnas.1500243112.sfig01.pdf [file pnas.1500243112.sfig01.pdf]

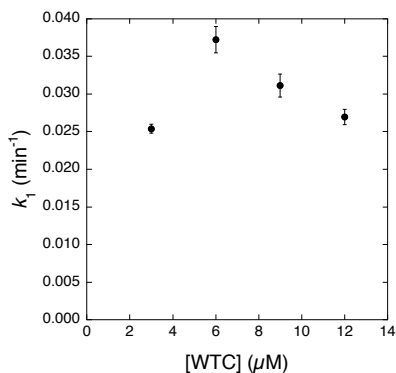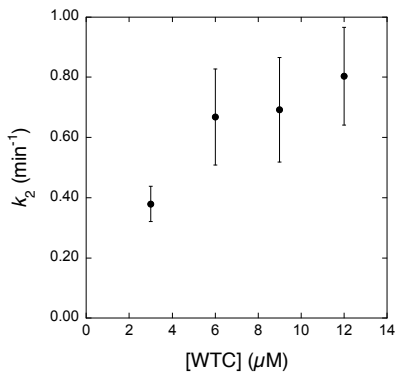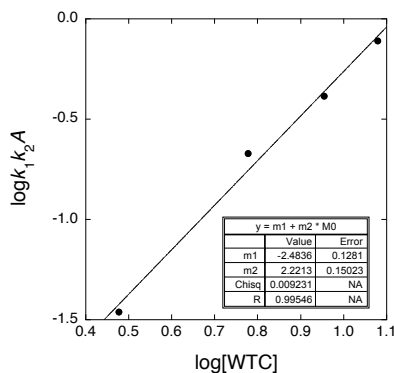

37 °C

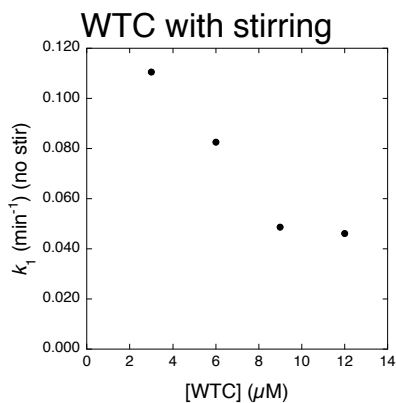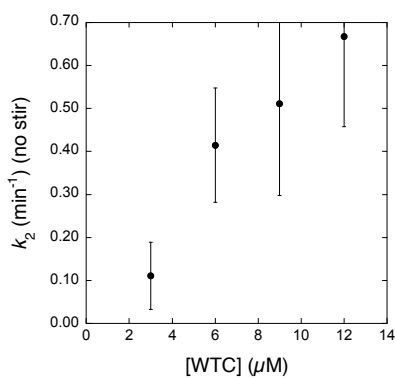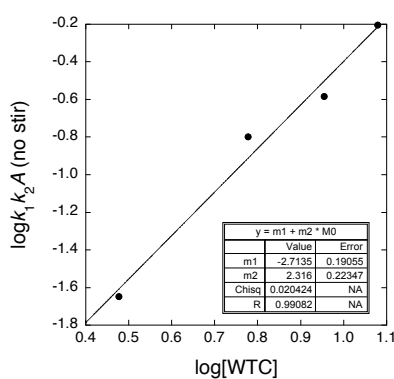

37 °C

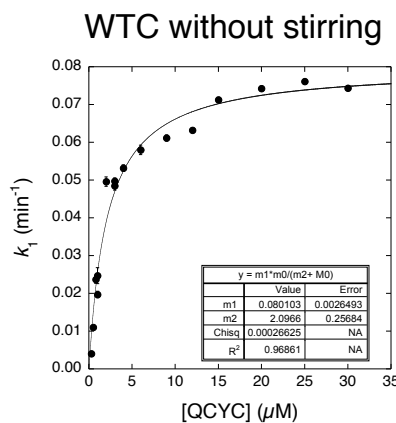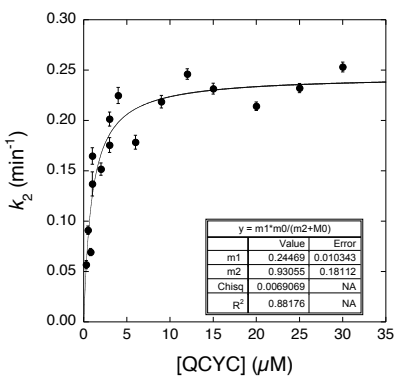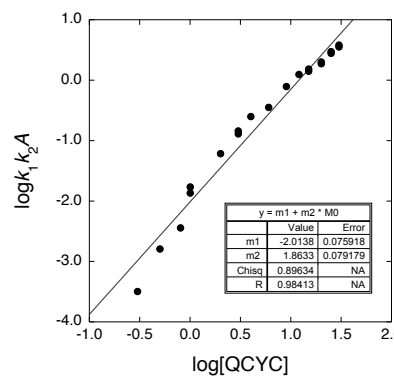

37 °C

$\Delta\Delta G_{D-N} = 4.20$  kcal/mol

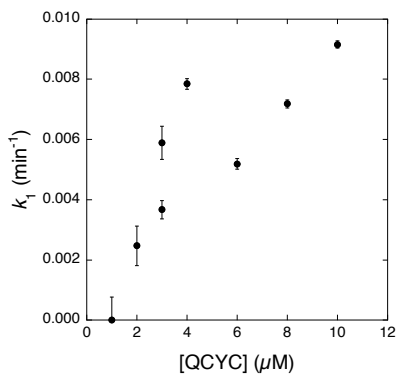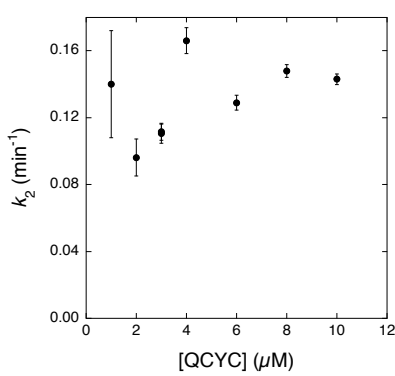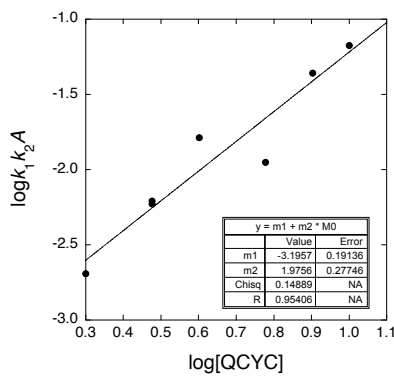

33.6 °C

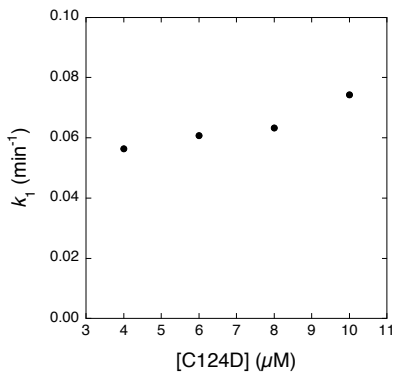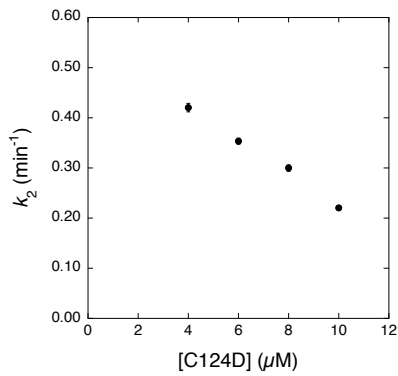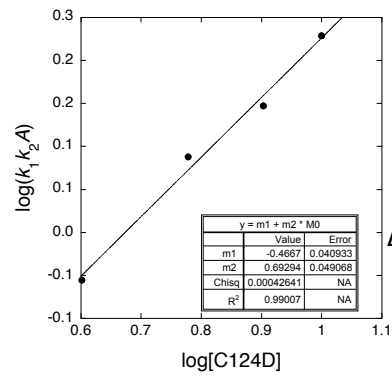

30 °C

$\Delta\Delta G_{D-N} = 2.13$  kcal/mol

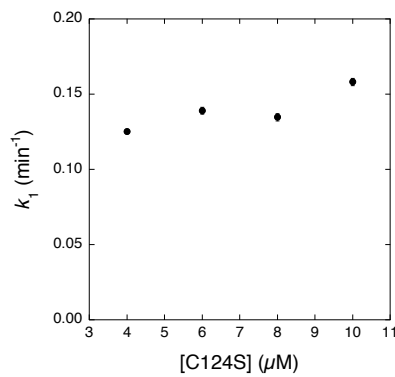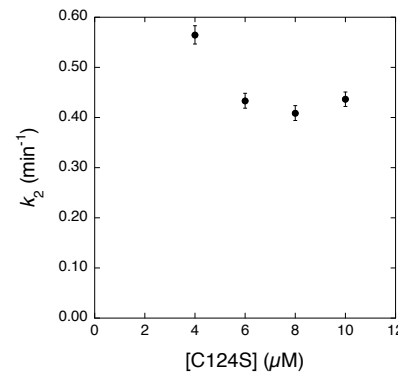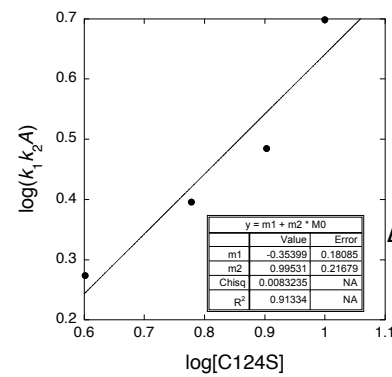

37 °C

$\Delta\Delta G_{D-N} = 0.25$  kcal/mol

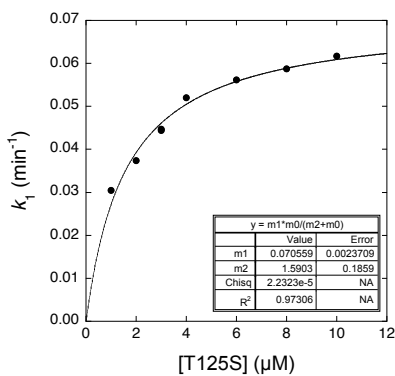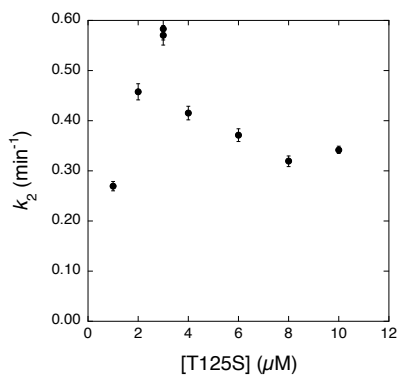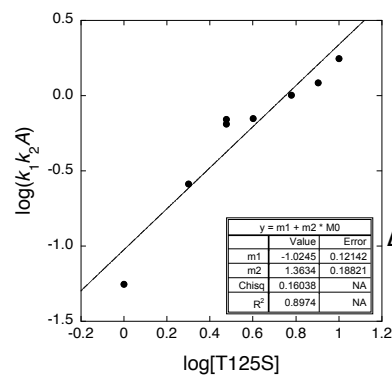

30 °C

$\Delta\Delta G_{D-N} = 2.46$  kcal/mol

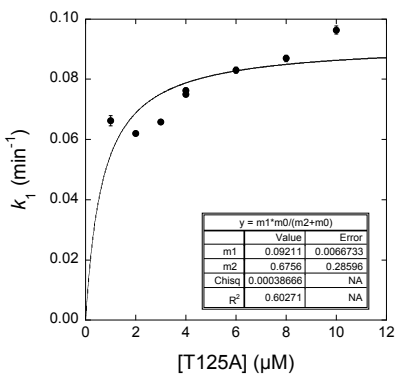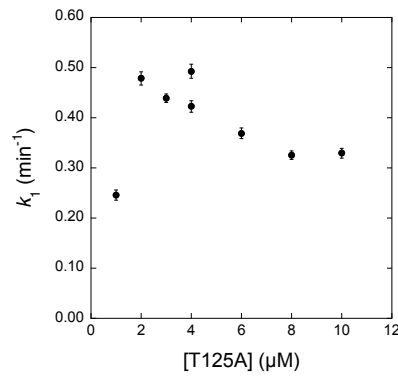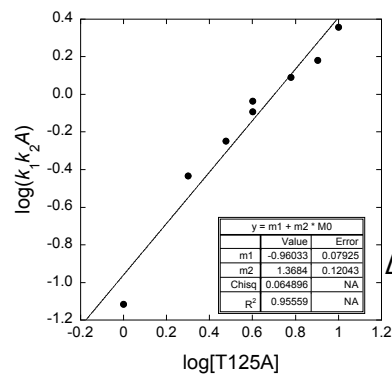

33.6 °C

$\Delta\Delta G_{D-N} = 1.17$  kcal/mol

L1 & S2 (121-127, SVTCTYS)

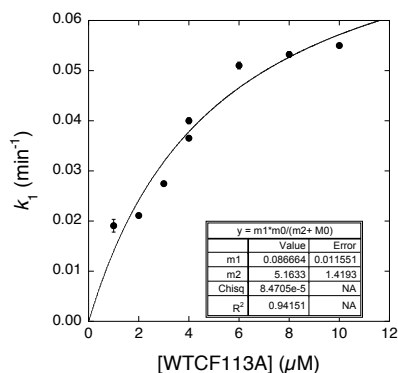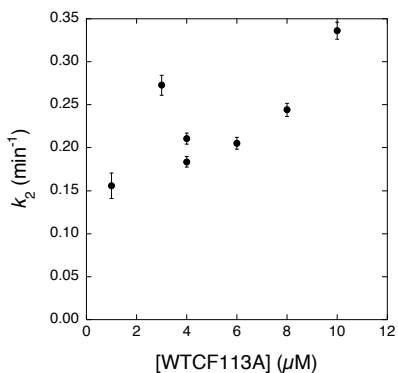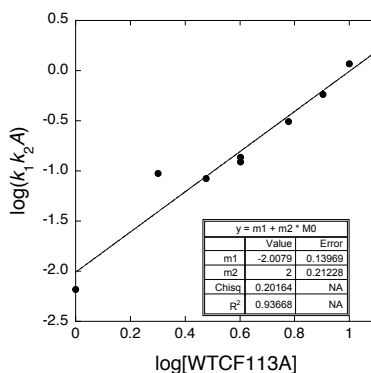

30 °C

S1L1 (109-113, FRGLF)

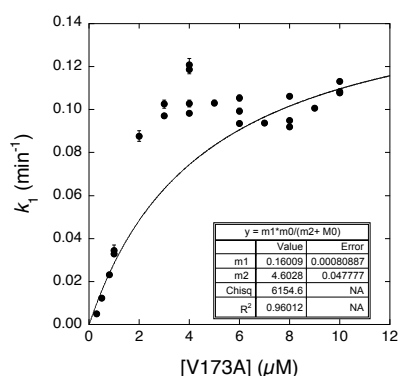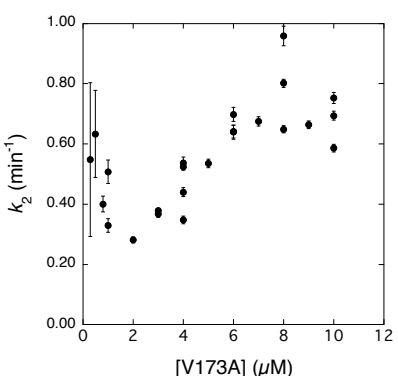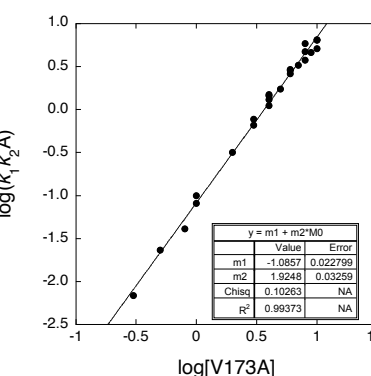

30 °C

$\Delta\Delta G_{D-N} = 2.46$  kcal/mol

L2

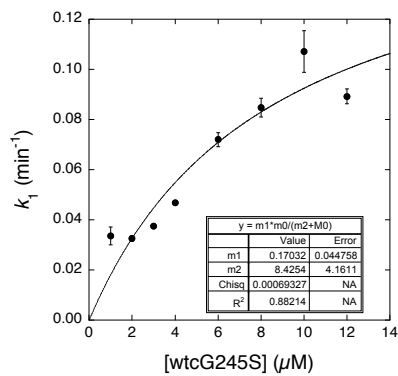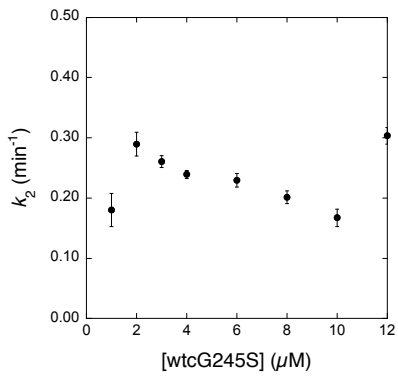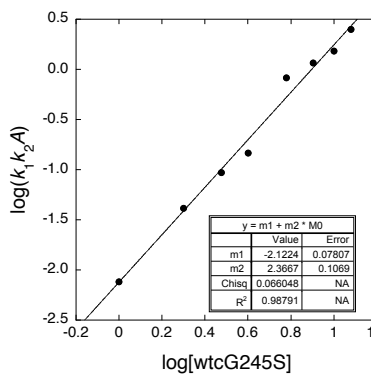

37 °C

L3

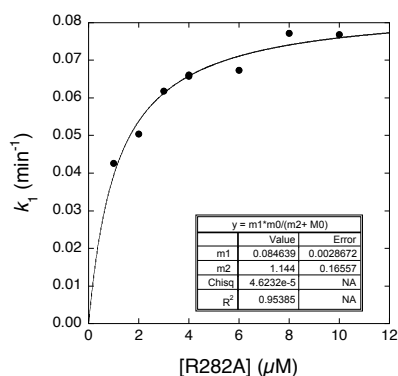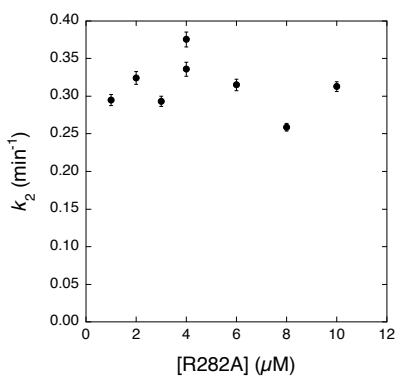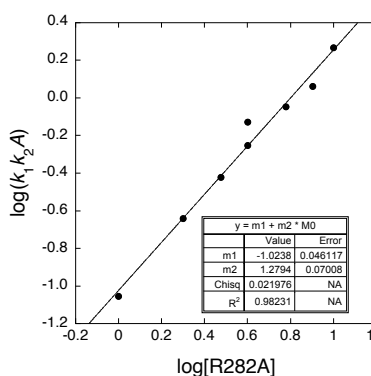

33.6 °C

$\Delta\Delta G_{D-N} = 1.16$  kcal/mol

H2

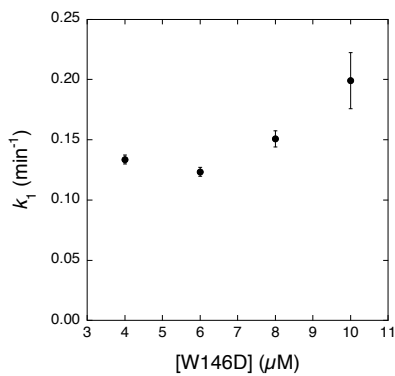

S3 (143-147, VQLWV)

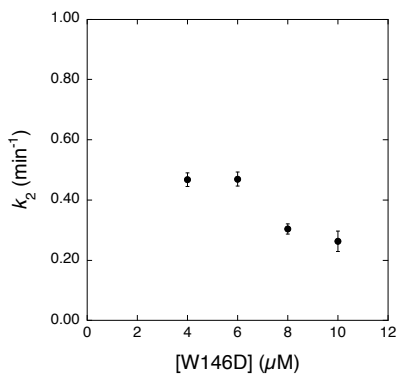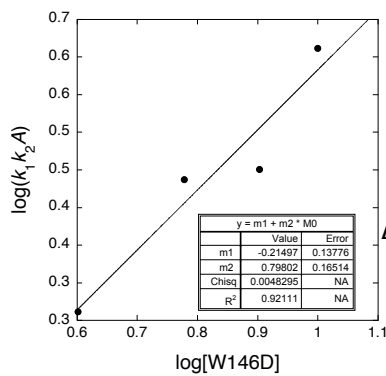

33.6 °C

$\Delta\Delta G_{D-N} = -3.89$  kcal/mol

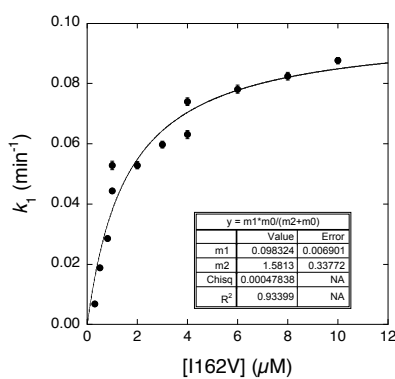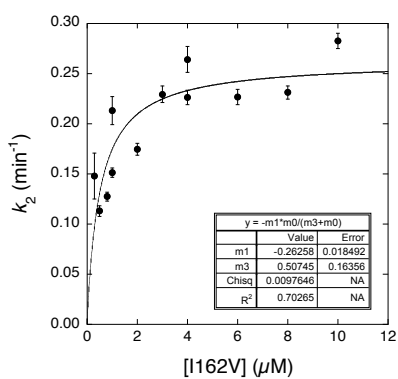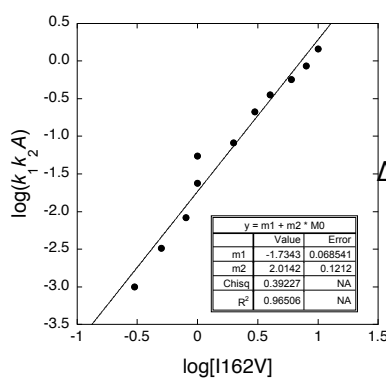

37 °C

$\Delta\Delta G_{D-N} = -0.06$  kcal/mol

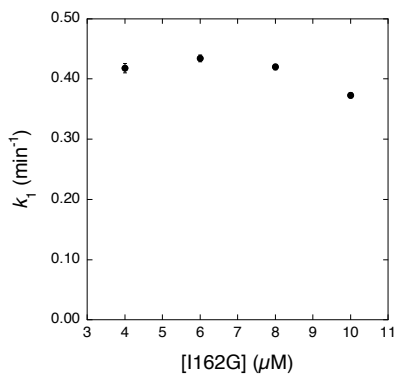

S4 (158-164, VRAMAIYK)

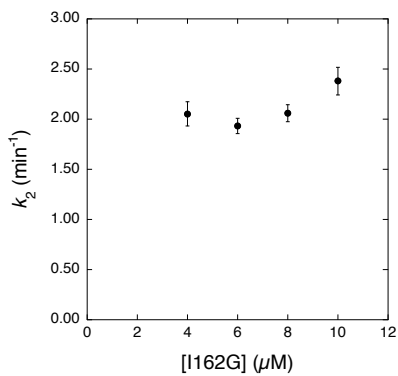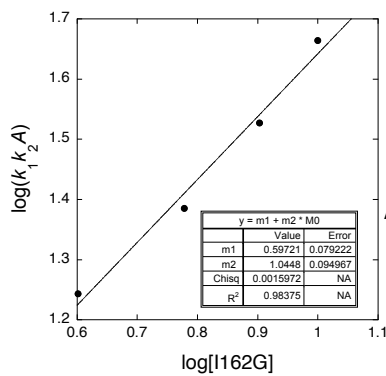

30 °C

$\Delta\Delta G_{D-N} = 5.64$  kcal/mol

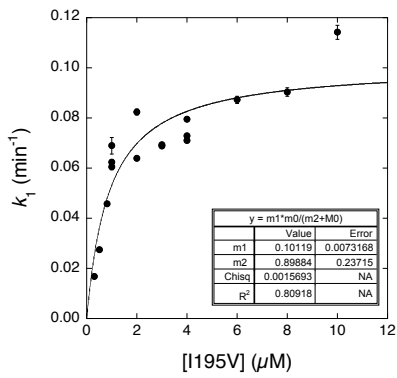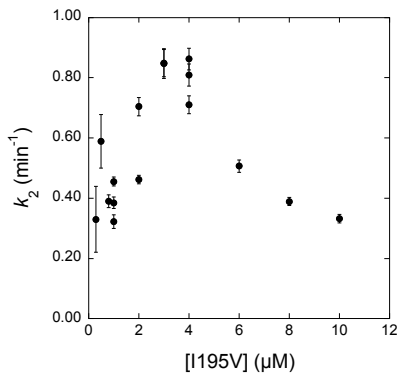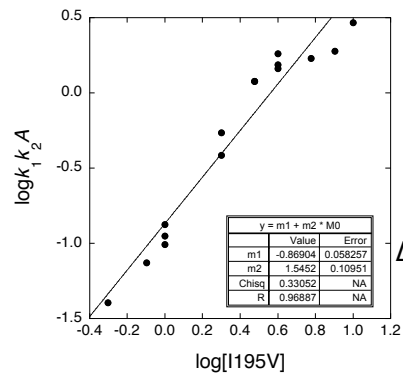

33.6 °C

$\Delta\Delta G_{D-N} = 1.67$  kcal/mol

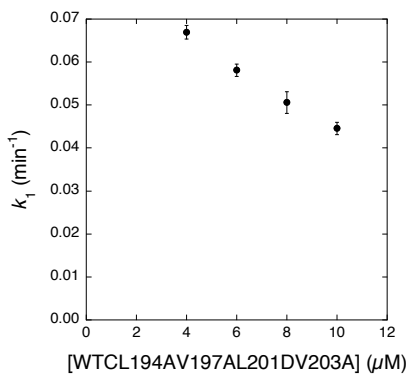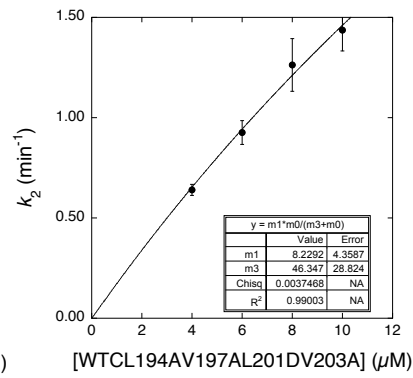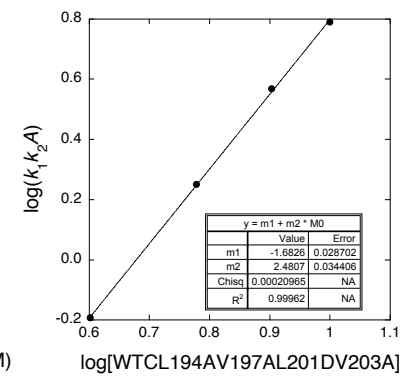

30 °C

S5 (194-203, LIRVEGNLRV)

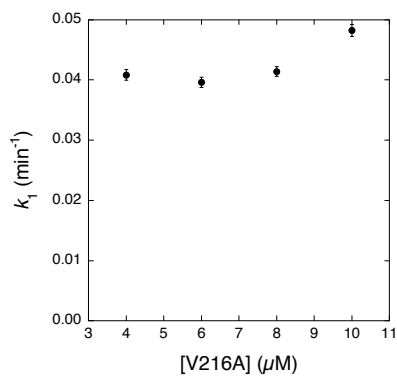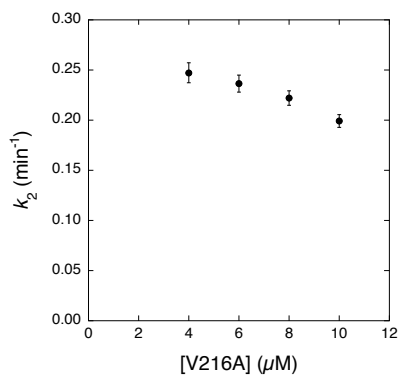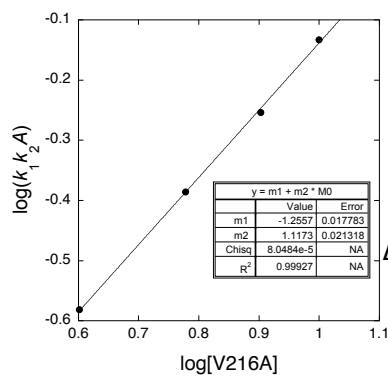

30 °C

$\Delta\Delta G_{D-N} = 1.63$  kcal/mol

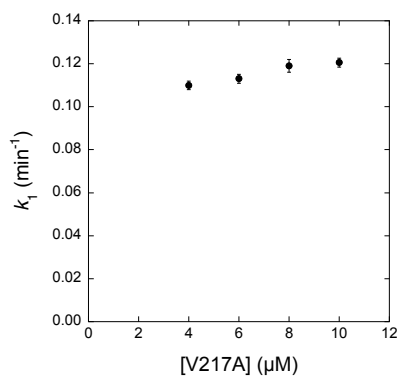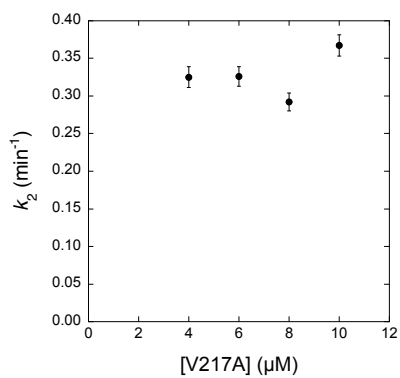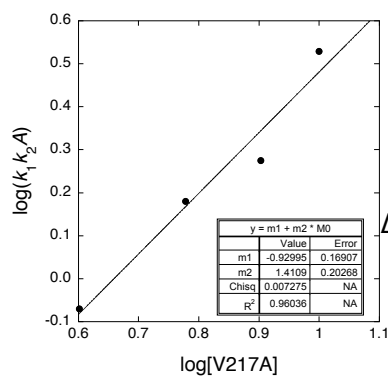

37 °C

$\Delta\Delta G_{D-N} = -0.01$  kcal/mol

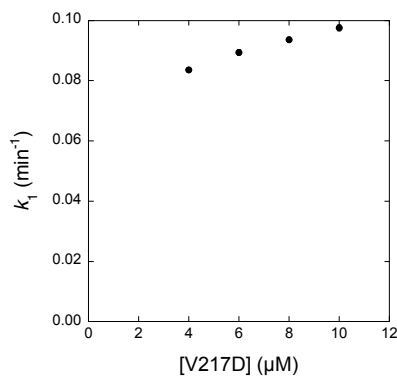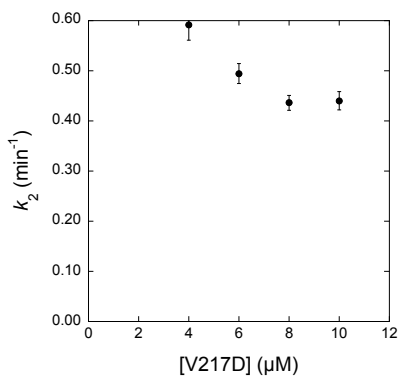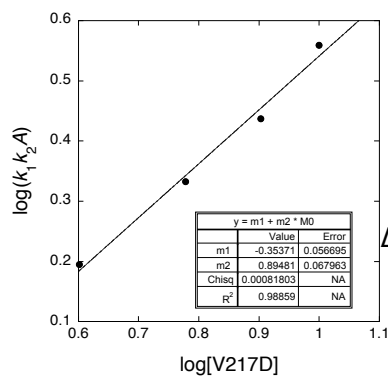

30 °C

$\Delta\Delta G_{D-N} = 2.10$  kcal/mol

S7 (214-218)

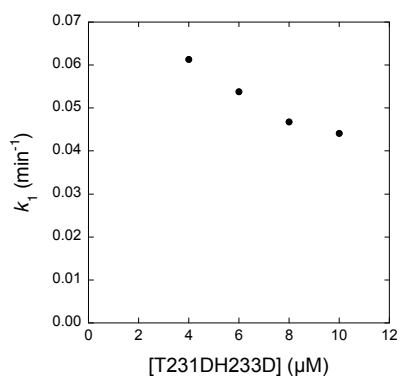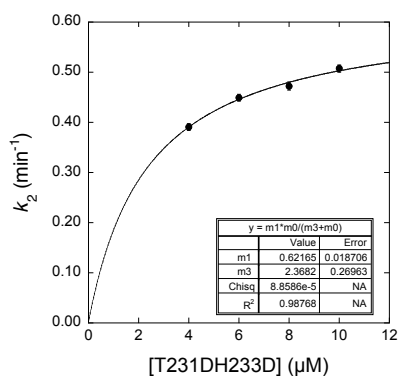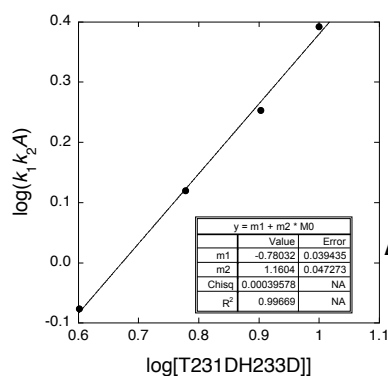

30 °C  
 $\Delta\Delta G_{D-N} = 2.98 \text{ kcal/mol}$

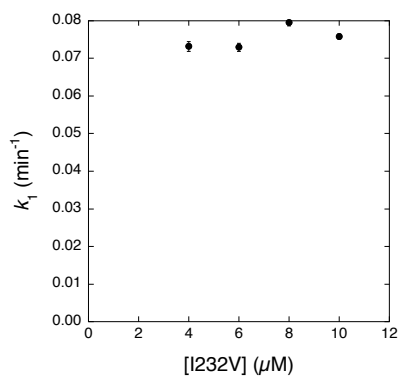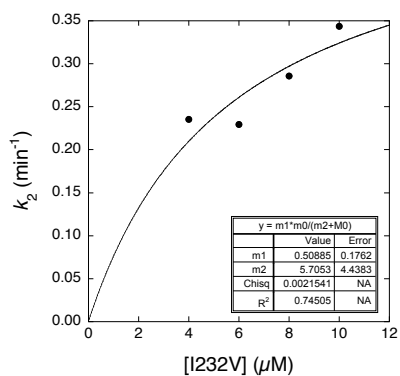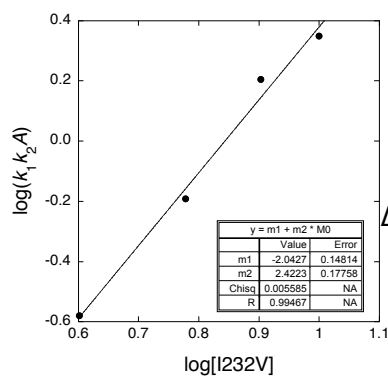

37 °C  
 $\Delta\Delta G_{D-N} = -0.34 \text{ kcal/mol}$

S8 (230-238)

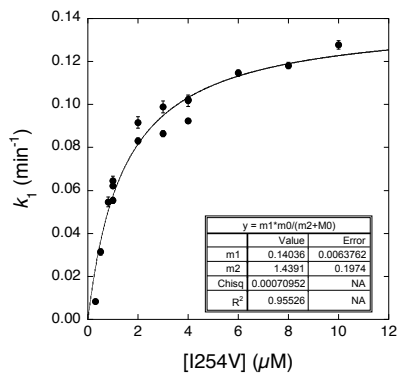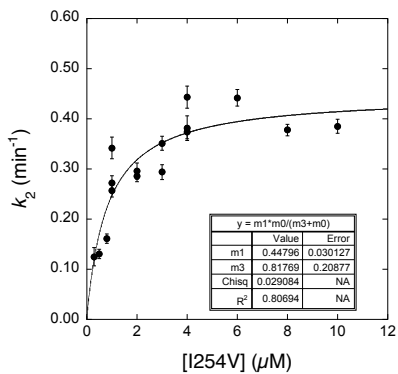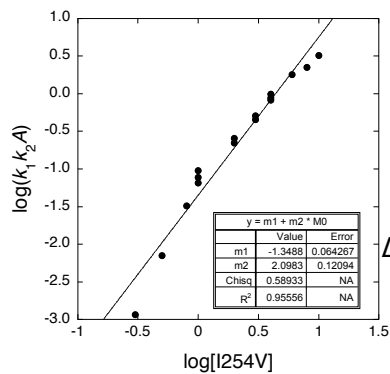

37 °C

$\Delta\Delta G_{D-N}=0.90$  kcal/mol

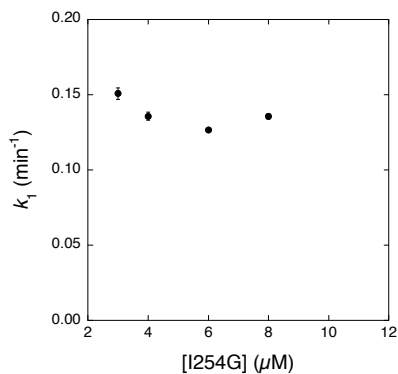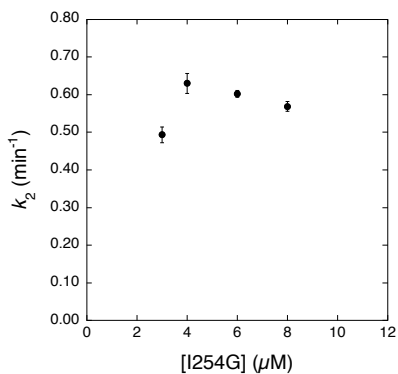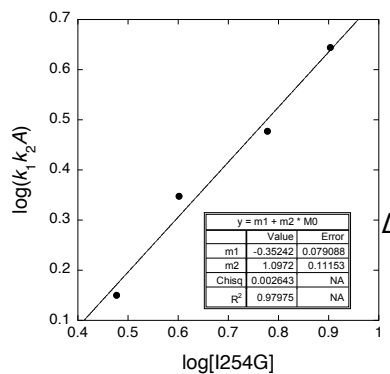

30 °C

$\Delta\Delta G_{D-N}=4.54$  kcal/mol

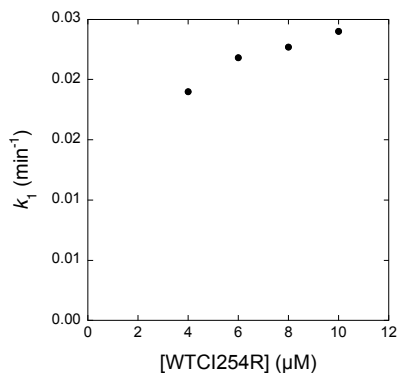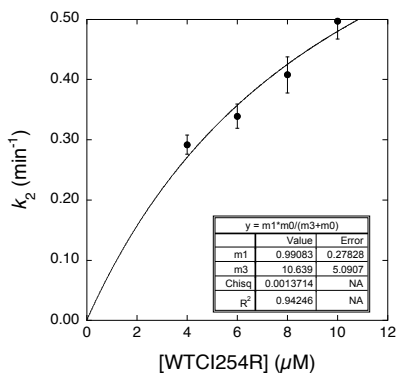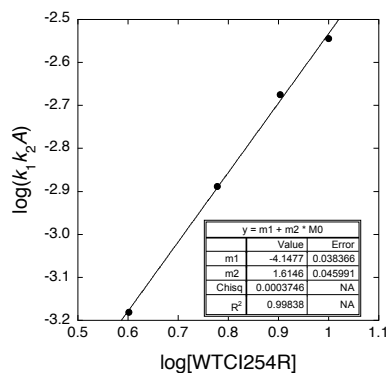

30 °C

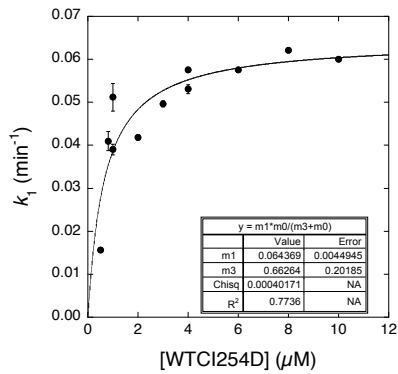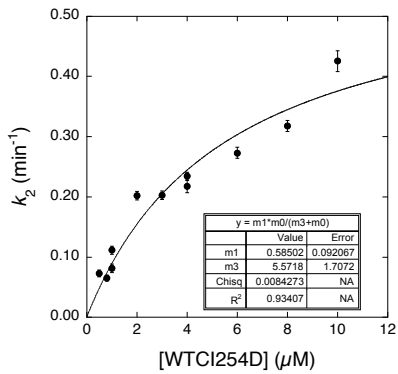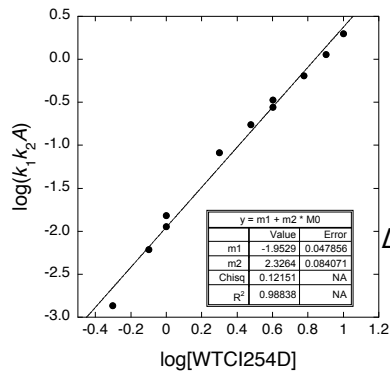

30 °C

$\Delta\Delta G_{D-N}=6.16$  kcal/mol



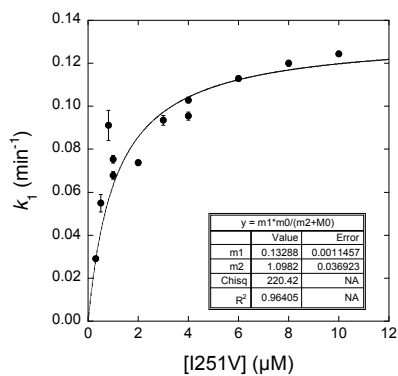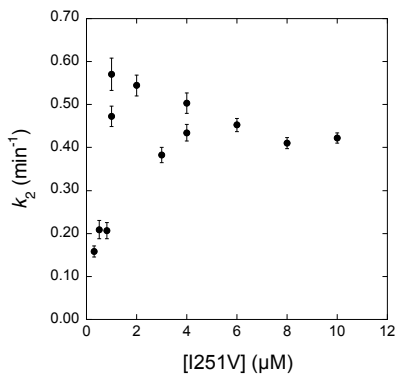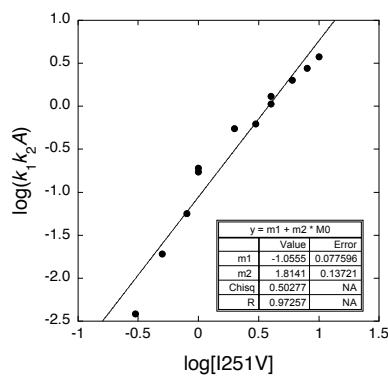

37 °C

$\Delta\Delta G_{D-N}=0.63$  kcal/mol

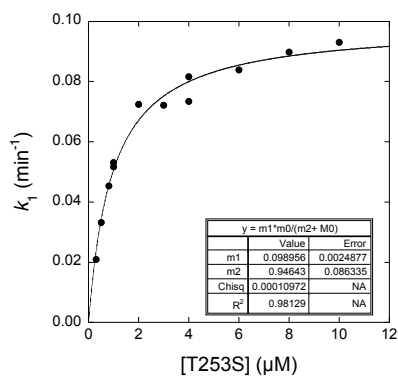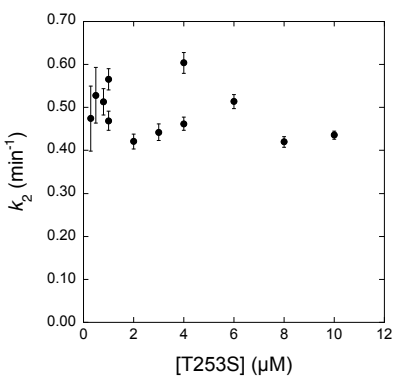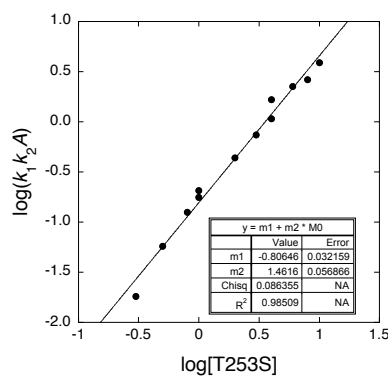

33.6 °C

$\Delta\Delta G_{D-N}=2.04$  kcal/mol

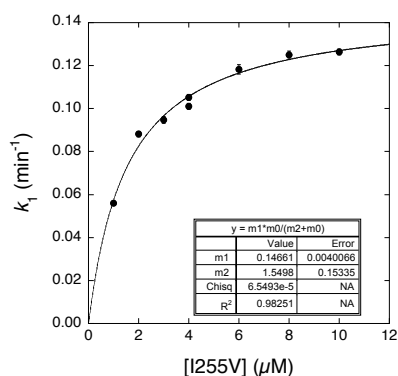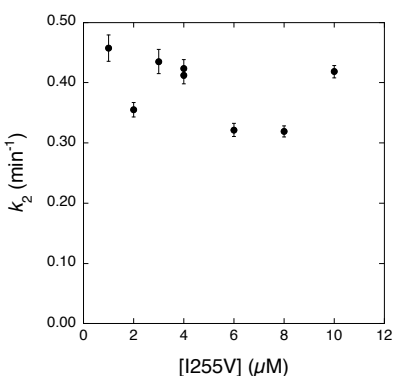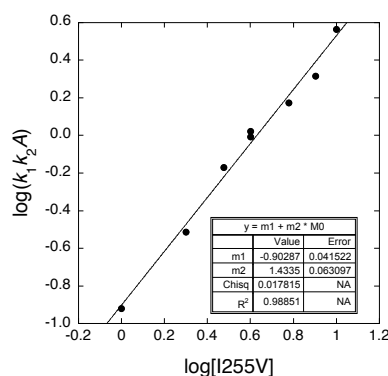

37 °C

$\Delta\Delta G_{D-N}=0.43$  kcal/mol

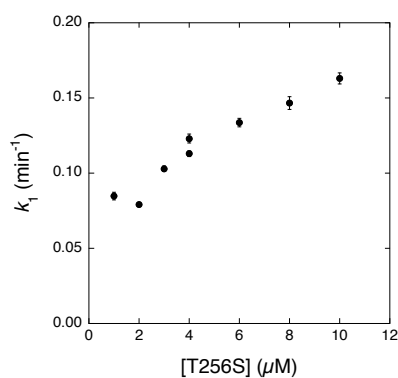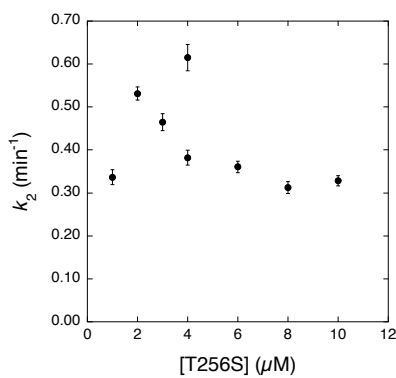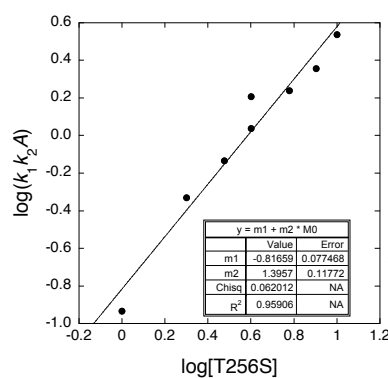

37 °C

$\Delta\Delta G_{D-N}=0.73$  kcal/mol

S9 (250-258, PILTIITLE)
