# Supplementary material
Source: PubMed Central journal article supplement (PMC4345617)

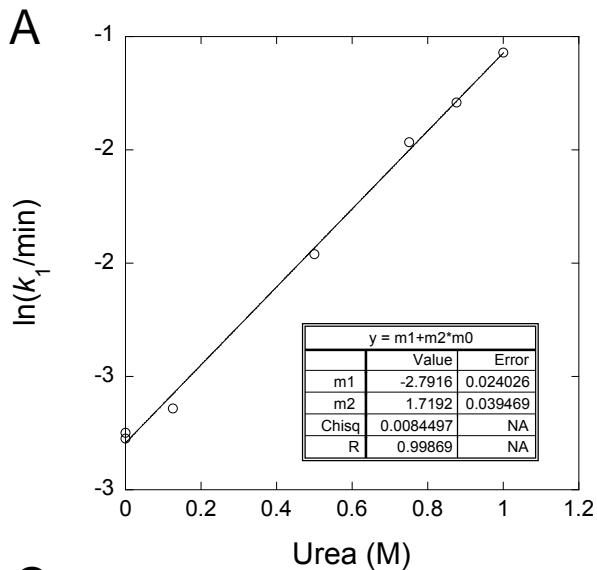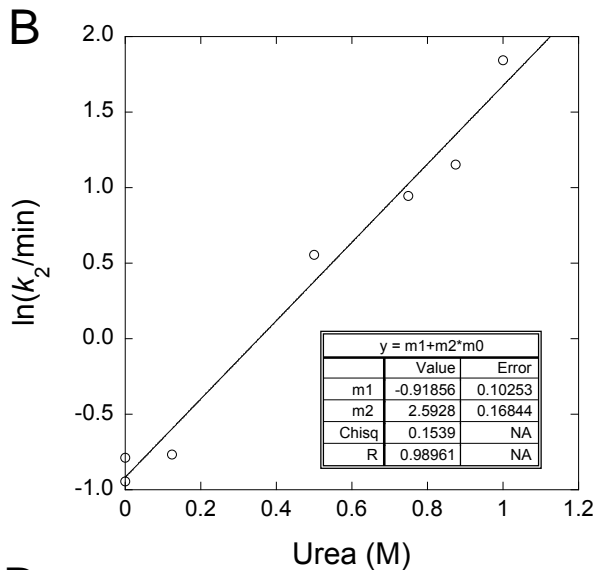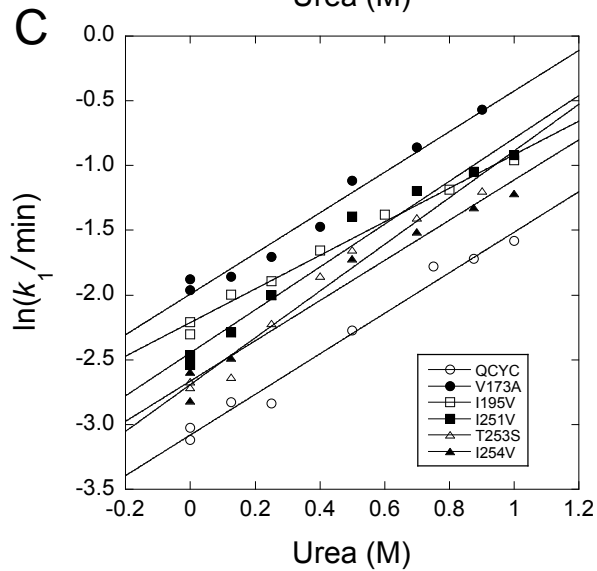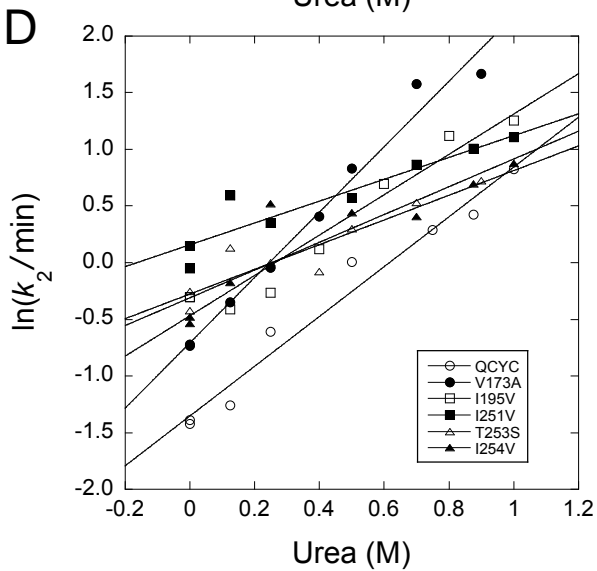

Supplement: pnas.1500243112.sfig03.pdf [file pnas.1500243112.sfig03.pdf]
